# Supplementary material for: Construction of Cd(ii) coordination polymers used as catalysts for the photodegradation of organic dyes in polluted water
Source: Royal Society of Chemistry journal article supplement (doi:10.1039/c3ce42360c), 2014-01-01
Supplement: c3ce42360c.pdf [file c3ce42360c.pdf]

## Electronic Supplementary Information (ESI)

### Construction of Cd(II) coordination polymers used as catalysts for photodegradation of organic dyes in polluted water

Duan-Xiu Li,<sup>a</sup> Chun-Yan Ni,<sup>a</sup> Min-Min Chen,<sup>a</sup> Ming Dai,<sup>a</sup> Wen-Hua Zhang,<sup>a</sup> Wen-Yan Yan,<sup>a</sup>  
Hai-Xiao Qi,<sup>a</sup> Zhi-Gang Ren,<sup>a</sup> and Jian-Ping Lang\*<sup>a,b</sup>

<sup>a</sup> *College of Chemistry, Chemical Engineering and Materials Science, Soochow University, Suzhou 215123, P. R. China*

<sup>b</sup> *State Key Laboratory of Organometallic Chemistry, Shanghai Institute of Organic Chemistry, Chinese Academy of Sciences, Shanghai 200032, P. R. China*

\*E-mail: [jplang@suda.edu.cn](mailto:jplang@suda.edu.cn)

## Table of Contents

|                                                                                                                                                                                                                                                                                                                                                                                                                                                                                                                                                                                                                                                                                        |     |
|----------------------------------------------------------------------------------------------------------------------------------------------------------------------------------------------------------------------------------------------------------------------------------------------------------------------------------------------------------------------------------------------------------------------------------------------------------------------------------------------------------------------------------------------------------------------------------------------------------------------------------------------------------------------------------------|-----|
| <b>Fig. S1</b> (a) PXRD patterns for <b>1</b> . Simulated (red), single-phase polycrystalline sample (black) and recycled sample (blue) of <b>1</b> . (b) PXRD patterns for <b>2</b> . Simulated (red), single-phase polycrystalline sample (black) and recycled sample (blue) of <b>2</b> . (c) PXRD patterns for <b>3</b> . Simulated (red), single-phase polycrystalline sample (black) and recycled sample (blue) of <b>3</b> . (d) PXRD patterns for <b>4</b> . Simulated (red), single-phase polycrystalline sample (black) and recycled sample (blue) of <b>4</b> .....                                                                                                         | S3  |
| <b>Fig. S2</b> (a) View of the 2D network of <b>1</b> extending along the <i>ac</i> plane. (b) View of hexagonal 1D channels of <b>1</b> extending along the <i>a</i> axis. (c) An adamantane-type unit within a single $[\text{Cd}(\text{tpcb})_{0.75}(\text{OH})(\text{OH}_2)_2]_n^{n+}$ net in <b>2</b> . (d) View of the coordination environment of the Cd <sup>2+</sup> centre in <b>3</b> with a labeling scheme. Symmetry codes: A: $-x + 2, -y + 3, -z + 1$ ; B: $-x + 1, -y + 2, -z + 1$ . (e) View of the $[\text{Cd}(\text{tpcb})_{0.5}]_n^{2n+}$ layer of <b>4</b> along the <i>ab</i> plane. (f) View of a 2D layer of <b>4</b> extending along the <i>bc</i> plane..... | S4  |
| <b>Fig. S3</b> The TGA curves for complexes <b>1–4</b> .....                                                                                                                                                                                                                                                                                                                                                                                                                                                                                                                                                                                                                           | S6  |
| <b>Fig. S4</b> UV-Vis absorption spectra of the MO (a), MB (b) and RhB (c) solutions degraded without photocatalysts under UV irradiation at different time intervals.....                                                                                                                                                                                                                                                                                                                                                                                                                                                                                                             | S7  |
| <b>Fig. S5</b> UV-Vis absorption spectra of the MO, MB and RhB solutions degraded by different photocatalysts under UV irradiation at different time intervals: (a) <b>1</b> in MO; (b) <b>2</b> in MO; (c) <b>3</b> in MO; (d) <b>4</b> in MO; (e) <b>1</b> in MB; (f) <b>2</b> in MB; (g) <b>3</b> in MB; (h) <b>4</b> in MB; (i) <b>1</b> in RhB; (j) <b>2</b> in RhB; (k) <b>3</b> in RhB; (l) <b>4</b> in RhB.....                                                                                                                                                                                                                                                                | S8  |
| <b>Fig. S6</b> Recycling experiments using <b>2</b> for the photocatalytic degradation of MO (a), MB (b) and RhB (c) under UV irradiation.....                                                                                                                                                                                                                                                                                                                                                                                                                                                                                                                                         | S12 |
| <b>Scheme S1</b> . Schematic diagram of the photocatalytic mechanism.....                                                                                                                                                                                                                                                                                                                                                                                                                                                                                                                                                                                                              | S13 |

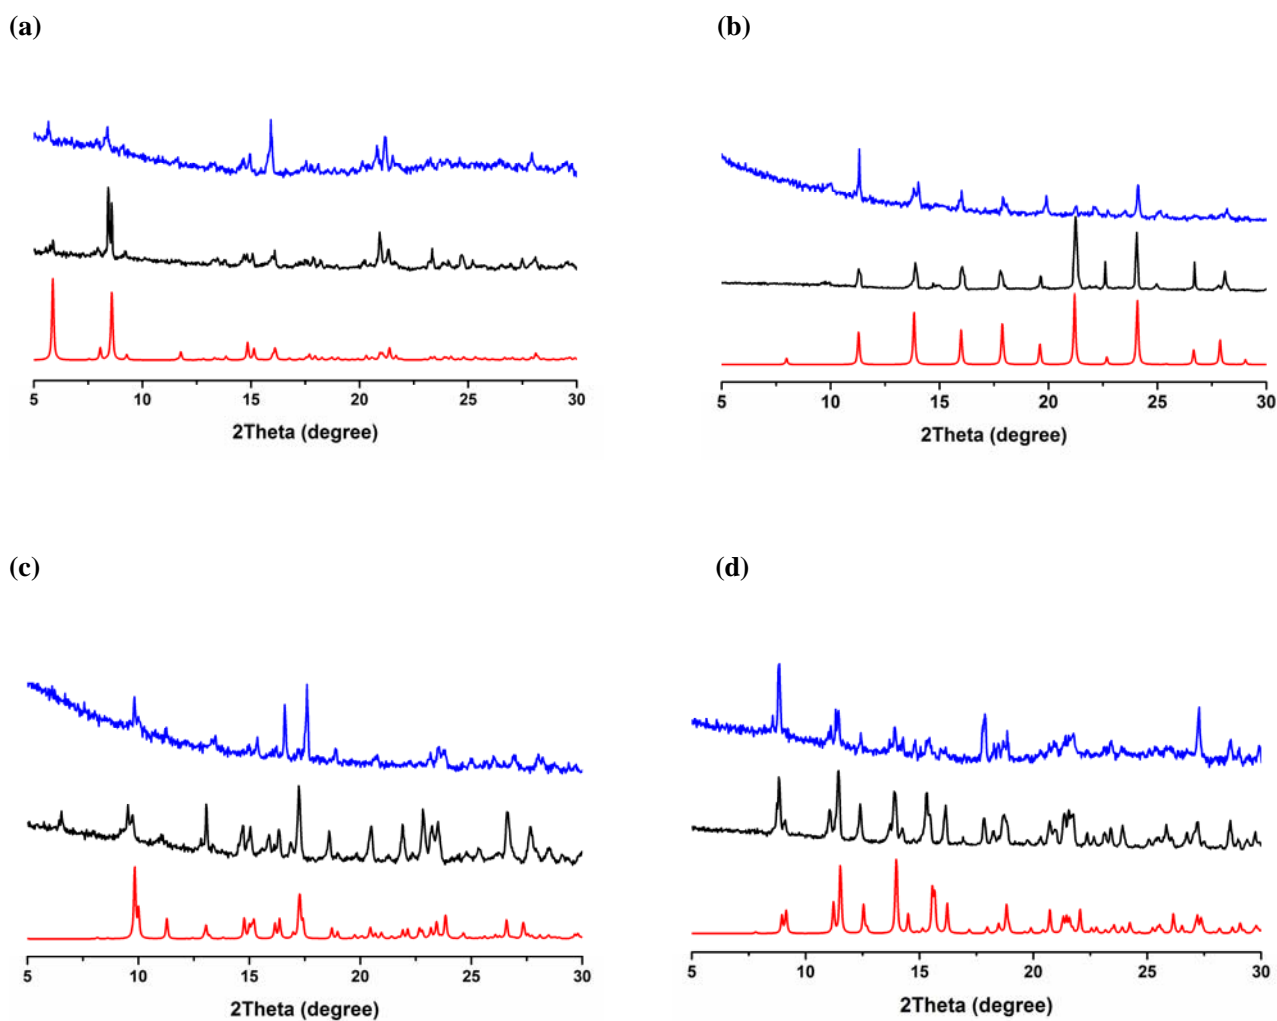

**Fig. S1** (a) PXRD patterns for **1**. Simulated (red), single-phase polycrystalline sample (black) and recycled sample (blue) of **1**. (b) PXRD patterns for **2**. Simulated (red), single-phase polycrystalline sample (black) and recycled sample (blue) of **2**. (c) PXRD patterns for **3**. Simulated (red), single-phase polycrystalline sample (black) and recycled sample (blue) of **3**. (d) PXRD patterns for **4**. Simulated (red), single-phase polycrystalline sample (black) and recycled sample (blue) of **4**. .....S3

(a)

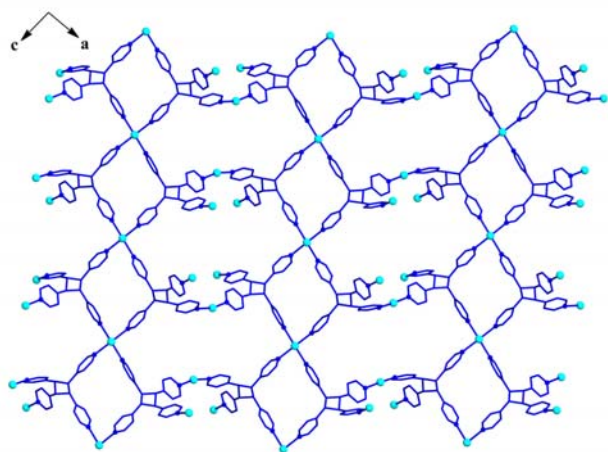

(b)

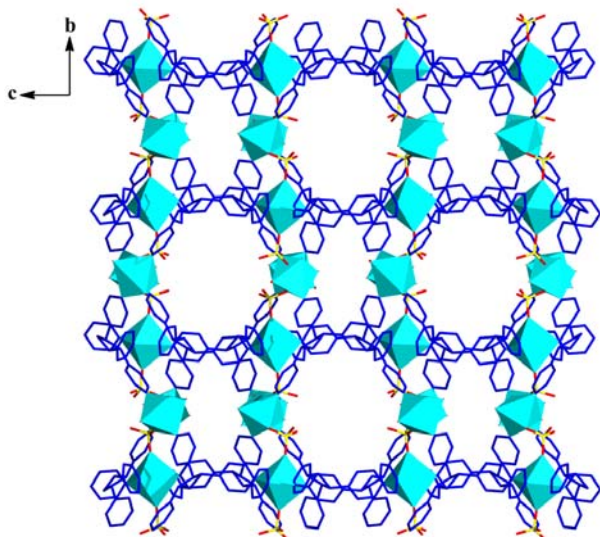

(c)

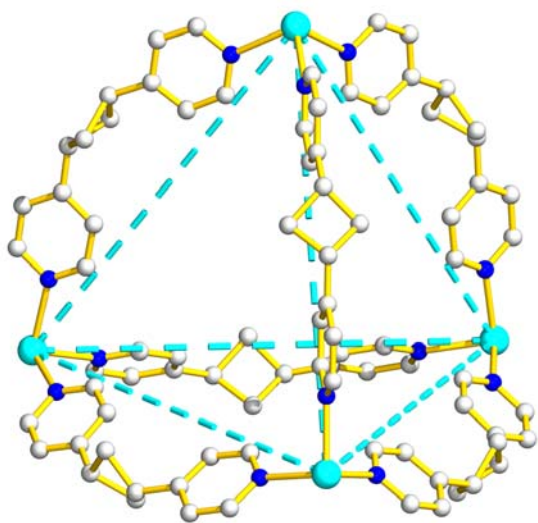

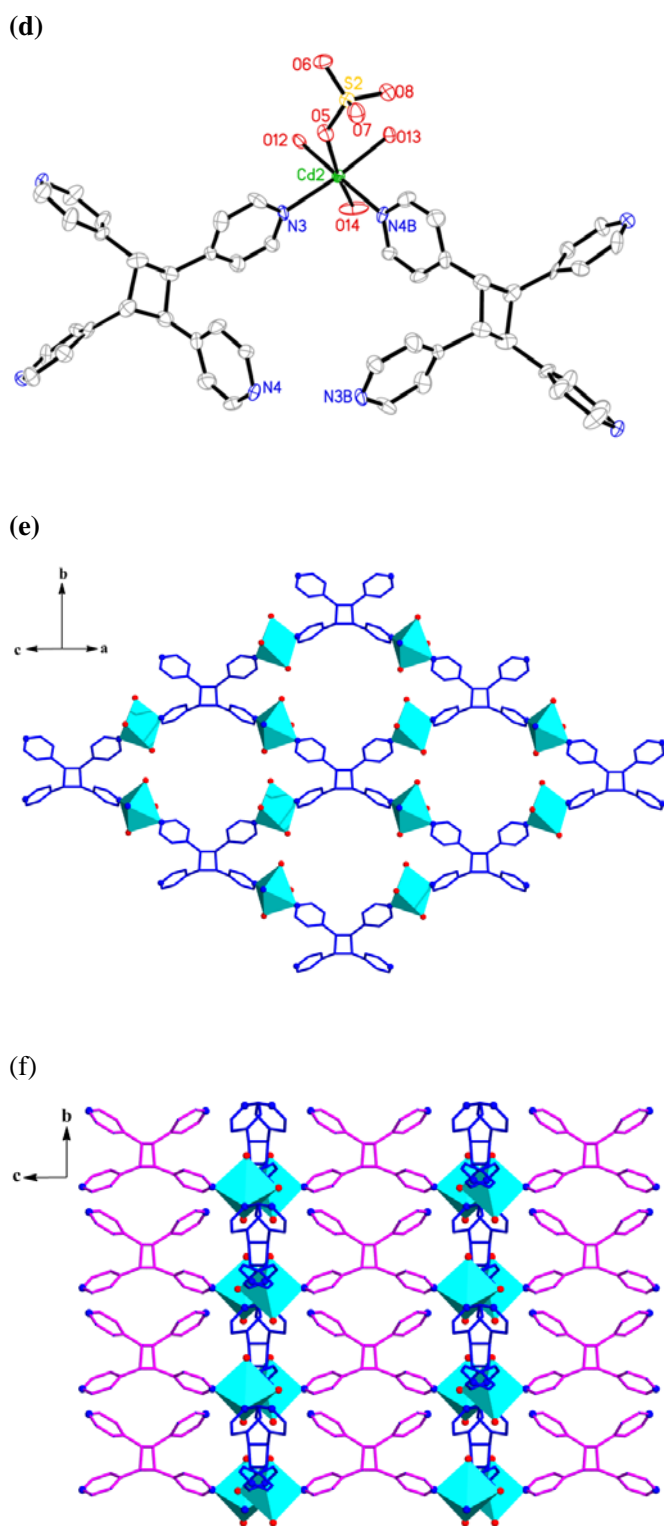

**Fig. S2** (a) View of the 2D network of **1** extending along the *ac* plane. (b) View of hexagonal 1D channels of **1** extending along the *a* axis. (c) An adamantane-type unit within a single  $[\text{Cd}(\text{tpcb})_{0.75}(\text{OH})(\text{OH}_2)_2]_n^{n+}$  net in **2**. (d) View of the coordination environment of the Cd2 centre in **3** with a labeling scheme. Symmetry codes: A:  $-x + 2, -y + 3, -z + 1$ ; B:  $-x + 1, -y + 2, -z + 1$ . (e) View of the  $[\text{Cd}(\text{tpcb})_{0.5}]_n^{2n+}$  layer of **4** along the *ab* plane. (f) View of a 2D layer of **4** extending along the *bc* plane.

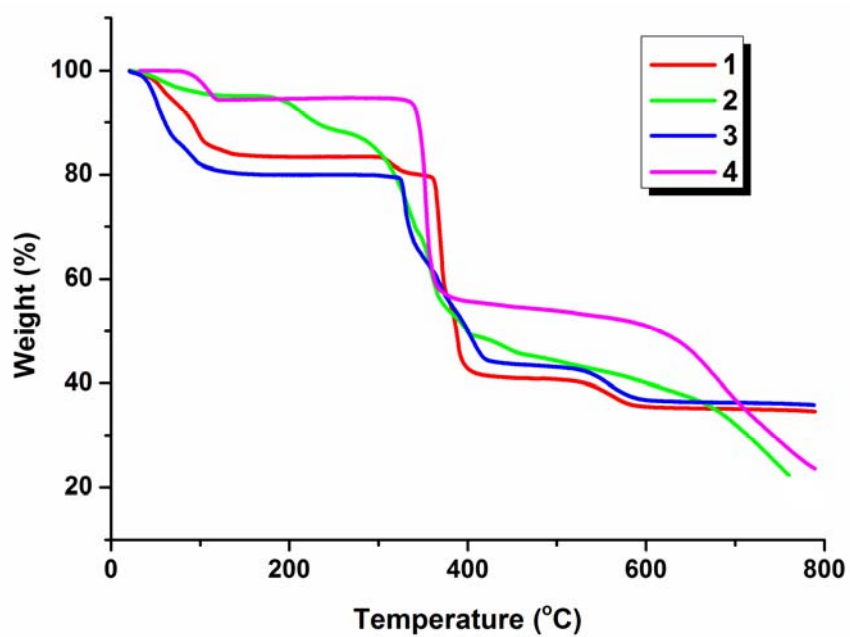

Fig. S3 The TGA curves for complexes 1-4.

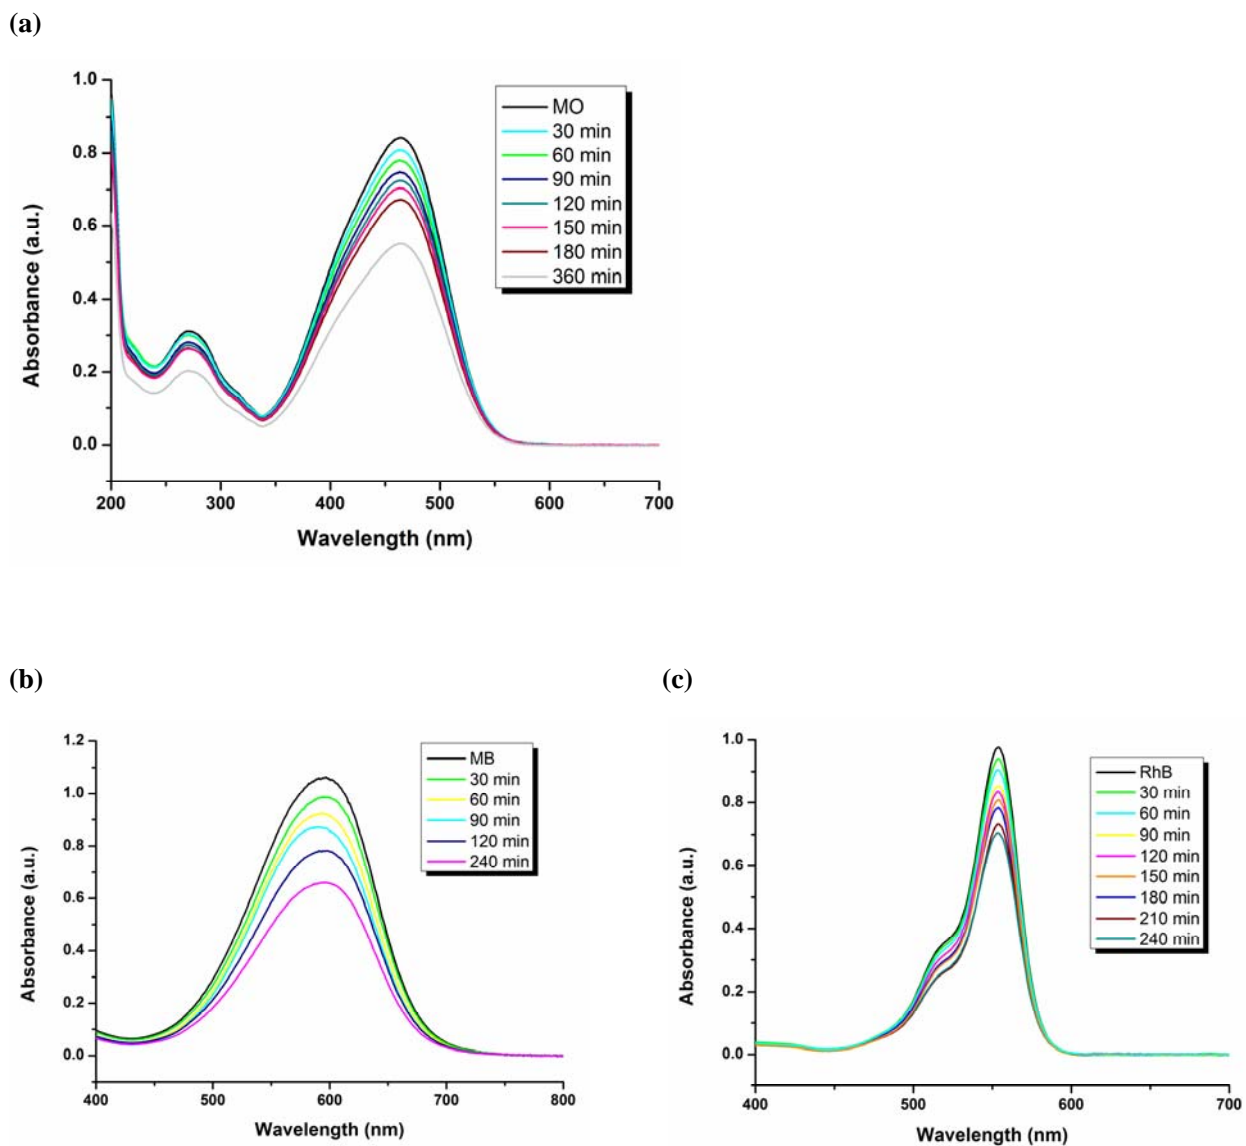

**Fig. S4** UV-Vis absorption spectra of the MO (a), MB (b), and RhB (c) solutions degraded without photocatalysts under UV irradiation at different time intervals.

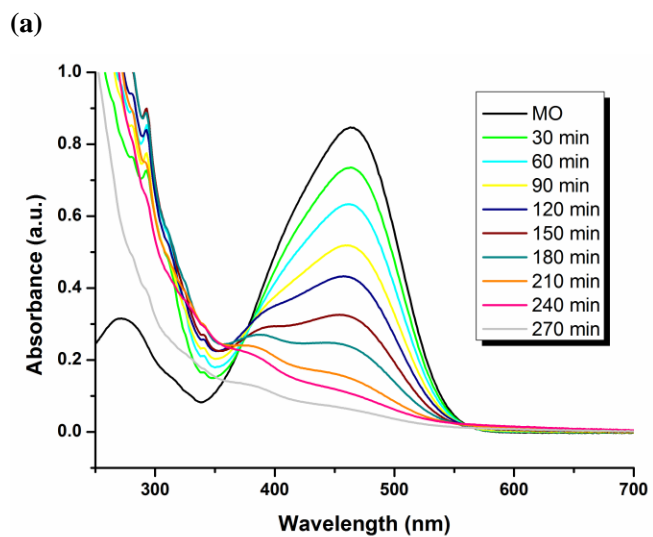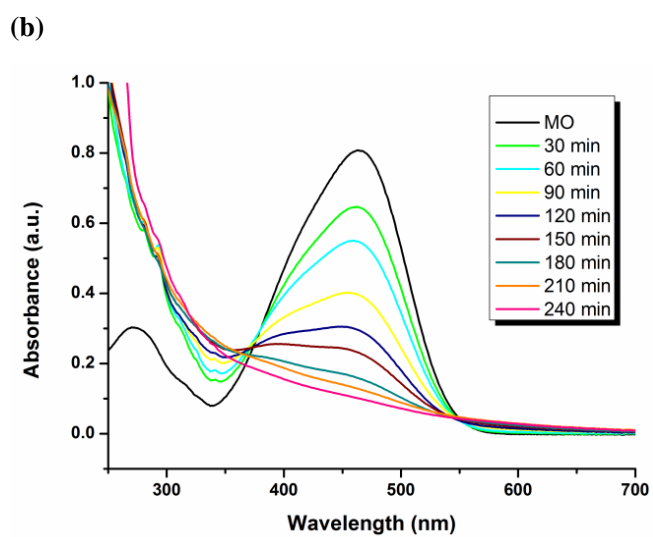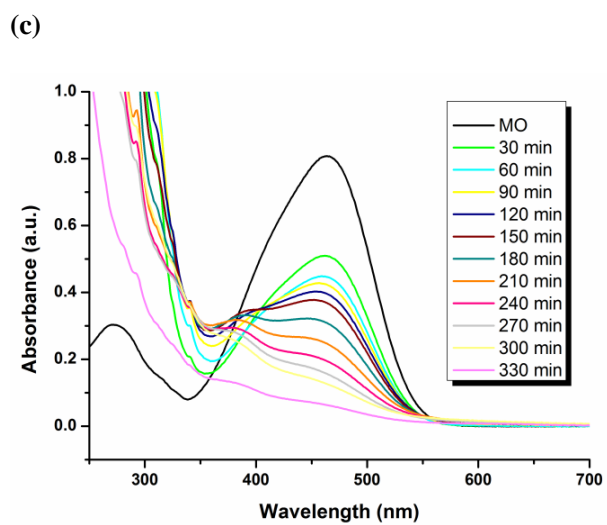



(d)

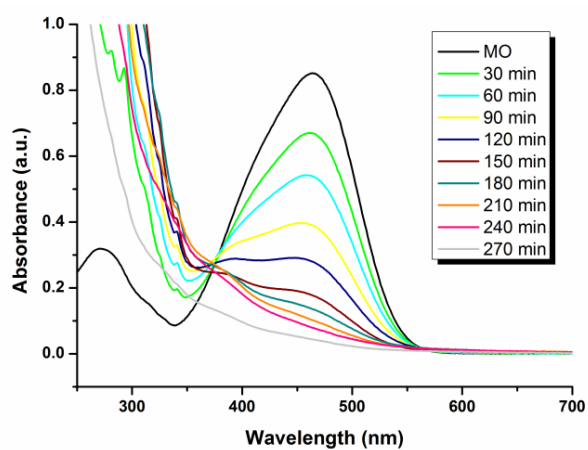

(e)

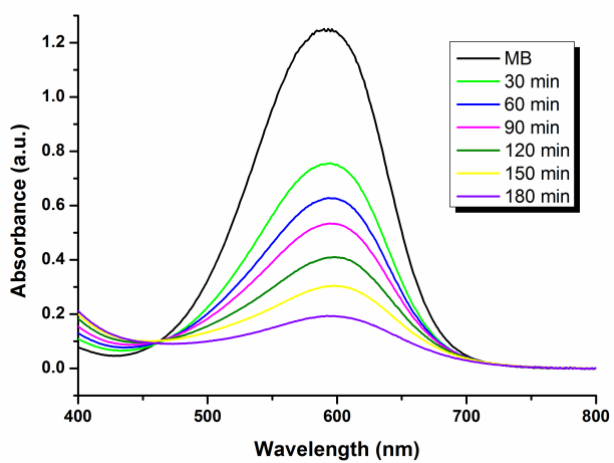

(f)

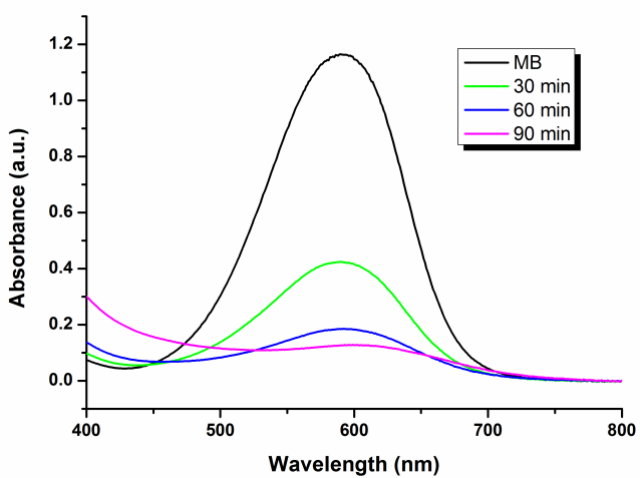

(g)

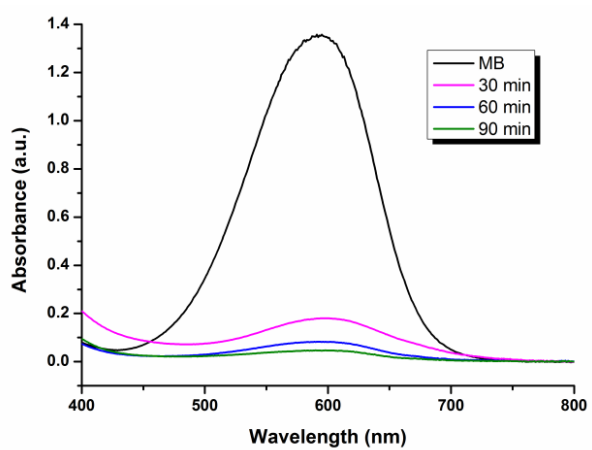

(h)

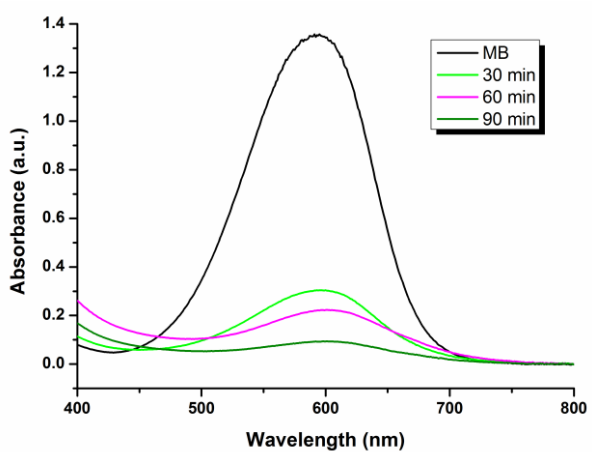

(i)

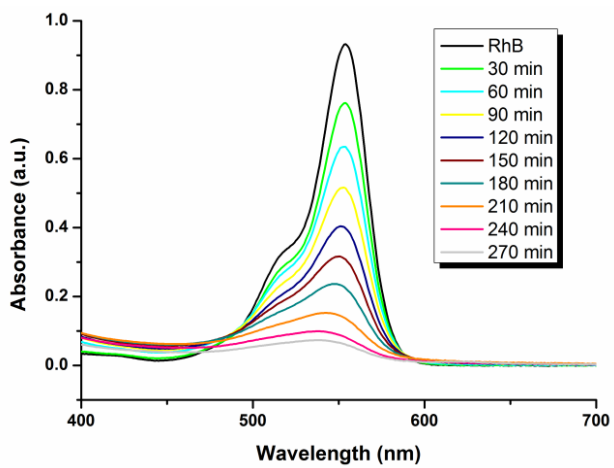

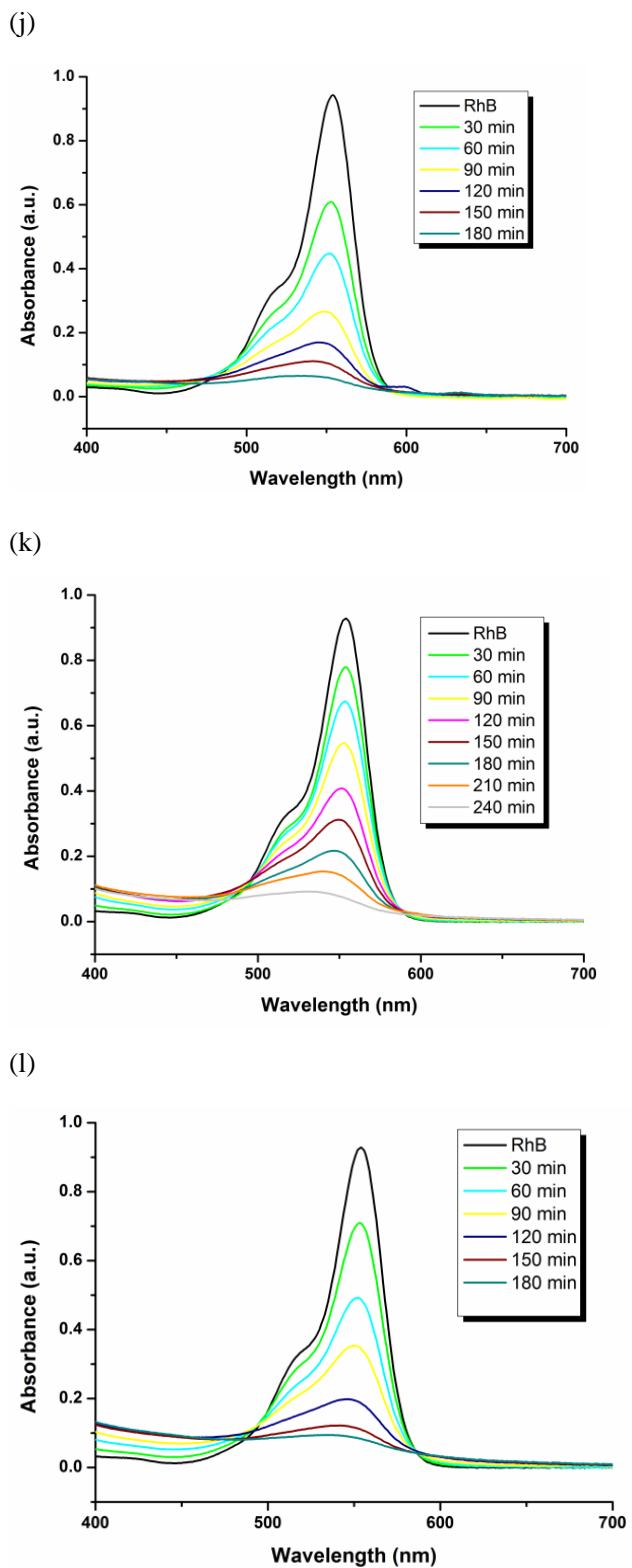

**Fig. S5** UV-Vis absorption spectra of the MO, MB and RhB solutions degraded by different photocatalysts under UV irradiation at different time intervals: (a) **1** in MO; (b) **2** in MO; (c) **3** in MO; (d) **4** in MO; (e) **1** in MB; (f) **2** in MB; (g) **3** in MB; (h) **4** in MB; (i) **1** in RhB; (j) **2** in RhB; (k) **3** in RhB; (l) **4** in RhB.

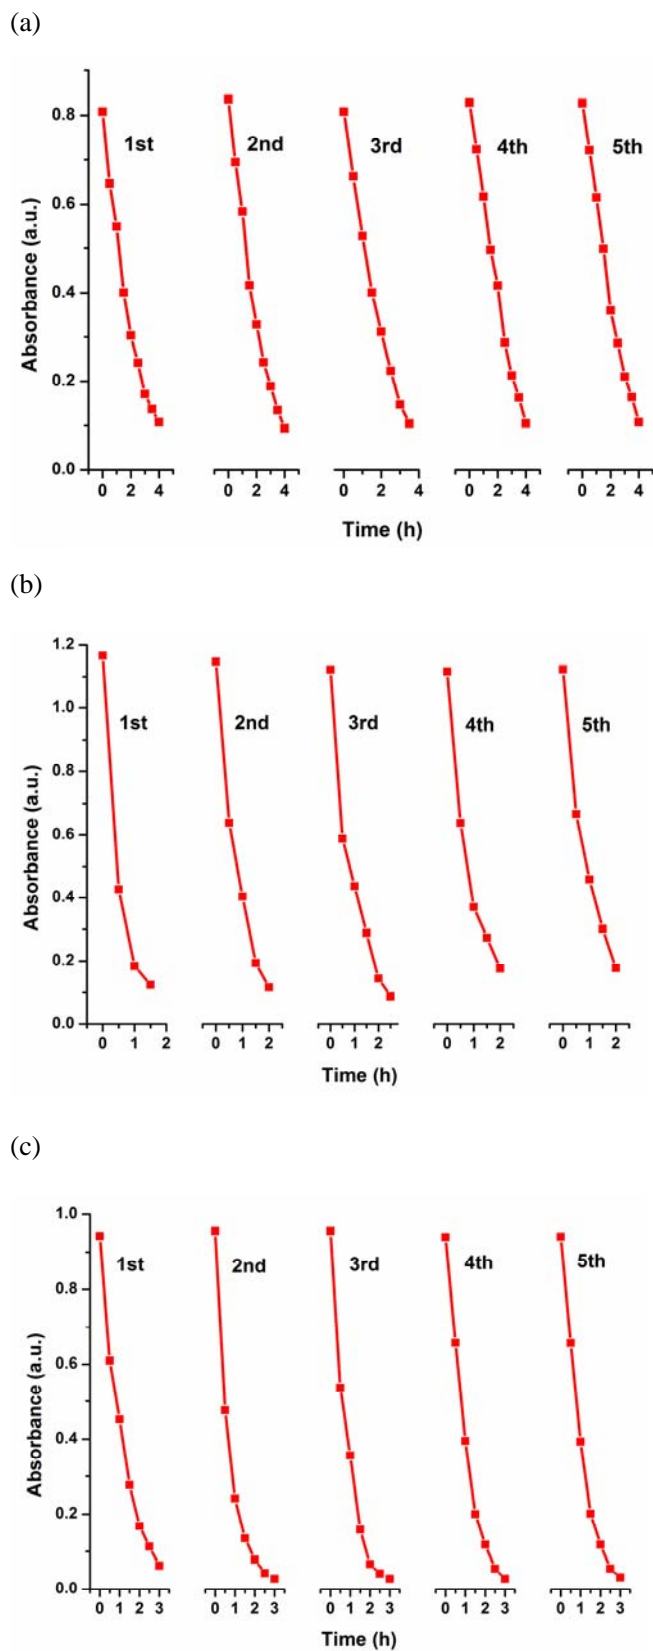

**Fig. S6** Recycling experiments using **2** for the photocatalytic degradation of MO (a), MB (b) and RhB (c) under UV irradiation.

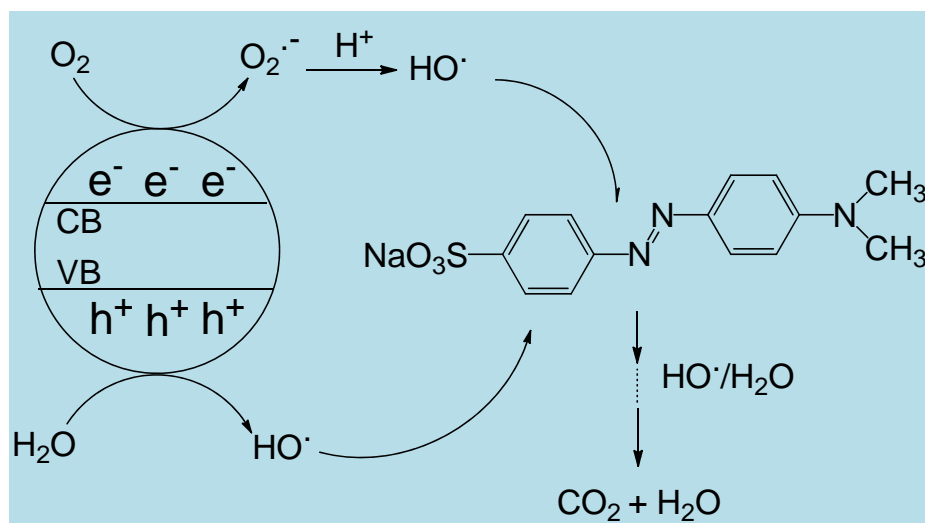

**Scheme S1** Schematic diagram of the photocatalytic mechanism.
